# Supplementary material
Source: PubMed Central journal article supplement (PMC10388696)
Supplement: NIHMS1890347-supplement-3.pdf [file NIHMS1890347-supplement-3.pdf]

**Progression-free Survival (PFS) Censoring Rules for Efficacy Analyses**

Censoring of PFS will be performed as detailed in the tables below. Two approaches of censoring will be implemented: one based on the last adequate disease status assessment, and one based on the last clinical visit.

| <b>PFS Censoring based on Last Adequate Disease Status Assessment Situation</b>                                    |                                                                                                     |                |
|--------------------------------------------------------------------------------------------------------------------|-----------------------------------------------------------------------------------------------------|----------------|
| <b>Situation</b>                                                                                                   | <b>Date of Event or Censoring</b>                                                                   | <b>Outcome</b> |
| A) No adequate baseline disease status assessment[1]                                                               | Date of first dose                                                                                  | Censored       |
| B) No adequate post-baseline disease status assessment unless death occurs prior to first post-baseline assessment | Date of first dose + 1                                                                              | Censored       |
| C) Documented progression                                                                                          | Date of the earliest assessment that results in a finding of progression                            | Event          |
| D) Death before progression documented and before last dose + 30 days                                              | Date of death                                                                                       | Event          |
| E) Death before progression being documented and after last dose + 30 days                                         | Date of last adequate disease status assessment                                                     | Censored       |
| F) No documented progression or death before data cutoff                                                           | Date of last adequate disease status assessment                                                     | Censored       |
| G) New anticancer treatment or procedure started before documented progression                                     | Date of last adequate disease status assessment prior to the new anticancer treatment or procedure. | Censored       |

[1] Patients who did not have a CT scan at baseline, but who were being followed and evaluated for disease progression will not be censored at baseline.

Note: An adequate post-baseline disease status assessment is any disease status assessment for which the investigator recorded disease status (eg, CR, PR, SD, and PD) per protocol-defined criteria.

**PFS Censoring based on Last Clinical Visit**

| <b>Situation</b>                                                                                                   | <b>Date of Event or Censoring</b>                                                                                                                  | <b>Outcome</b> |
|--------------------------------------------------------------------------------------------------------------------|----------------------------------------------------------------------------------------------------------------------------------------------------|----------------|
| A) No adequate baseline disease status assessment [1]                                                              | Date of first dose                                                                                                                                 | Censored       |
| B) No adequate post-baseline disease status assessment unless death occurs prior to first post-baseline assessment | Last visit date (any visit [2] through the end of treatment visit) before data cutoff. If the last visit date is C1D1 then date of first dose + 1. | Censored       |
| C) Documented progression                                                                                          | Date of the earliest assessment that results in a finding of progression                                                                           | Event          |
| D) Death before progression being documented and before last dose + 30 days                                        | Date of death                                                                                                                                      | Event          |
| E) Death before progression being documented and after last dose + 30 days                                         | Last visit date (any visit [2] through the end of treatment visit) before date of last dose + 30 days                                              | Censored       |
| F) No documented progression or death before data cutoff                                                           | Last visit date before data cutoff.                                                                                                                | Censored       |
| G) New anticancer treatment or procedure started before documented progression                                     | Last visit date before new anticancer treatment or procedure date                                                                                  | Censored       |

[1] Patients who did not have a CT scan at baseline, but who were being followed and evaluated for disease progression will not be censored at baseline.

[2] Visits will include visits at which labs or vital signs are collected.

Note: An adequate post-baseline disease status assessment is any disease status assessment for which the investigator records disease status (eg, CR, PR, SD, and PD) per protocol-defined criteria.
