# Supplementary material
Source: PubMed Central journal article supplement (PMC10388696)
Supplement: NIHMS1890347-supplement-5.pdf [file NIHMS1890347-supplement-5.pdf]

**Table S2. Summary of anti-tumor activity endpoints in patients treated with eganelisib monotherapy and combination therapy**

| <b>Category</b>                                  | <b>Monotherapy<br/>(N=39)<br/>n (%)</b> | <b>Combination therapy<br/>(N=180)<br/>n (%)</b> |
|--------------------------------------------------|-----------------------------------------|--------------------------------------------------|
| <b>ORR (CR+PR)<sup>a,b</sup></b>                 |                                         |                                                  |
| n                                                | 37                                      | 169                                              |
| ORR                                              | 1 (2.7)                                 | 12 (7.1)                                         |
| 95% exact binomial CI                            | [0.1, 14.2]                             | [3.7, 12.1]                                      |
| <b>DCR (CR+PR+SD)<sup>a</sup></b>                |                                         |                                                  |
| n                                                | 37                                      | 169                                              |
| DCR                                              | 15 (40.5)                               | 61 (36.1)                                        |
| 95% exact binomial CI                            | [24.8, 57.9]                            | [28.9, 43.8]                                     |
| <b>Best overall response<sup>a</sup></b>         |                                         |                                                  |
| n                                                | 39                                      | 180                                              |
| CR                                               | 0                                       | 1 (0.6)                                          |
| PR                                               | 1 (2.6)                                 | 11 (6.1)                                         |
| SD                                               | 14 (35.9)                               | 49 (27.2)                                        |
| PD                                               | 16 (41.0)                               | 79 (43.9)                                        |
| NE                                               | 6 (15.4)                                | 29 (16.1)                                        |
| <b>CBR-24<sup>b,c</sup></b>                      |                                         |                                                  |
| n                                                | 37                                      | 169                                              |
| CB                                               | 5 (13.5)                                | 25 (14.8)                                        |
| 95% exact binomial CI                            | [4.5, 28.8]                             | [9.8, 21.1]                                      |
| <b>CBR-16<sup>b,c</sup></b>                      |                                         |                                                  |
| n                                                | 37                                      | 169                                              |
| CB                                               | 7 (18.9)                                | 31 (18.3)                                        |
| 95% exact binomial CI                            | [8.0, 35.2]                             | [12.8, 25.0]                                     |
| <b>TTR, months<sup>d</sup></b>                   |                                         |                                                  |
| Median (95% CI)                                  | 11.1 [NA, NA]                           | 1.8 [1.8, 2.3]                                   |
| <b>DOR, months<sup>d</sup></b>                   |                                         |                                                  |
| Patients with PD or died, n                      | 1                                       | 10                                               |
| Censored, n                                      | 0                                       | 4                                                |
| Median (95% CI)                                  | 9.5 [NA, NA]                            | 9.2 [3.8, 11.4]                                  |
| <b>DOT, months</b>                               |                                         |                                                  |
| Patients with treatment failure <sup>e</sup> , n | 30                                      | 157                                              |
| Censored, n                                      | 9                                       | 23                                               |
| Median (95% CI)                                  | 2.0 [1.9, 4.7]                          | 2.1 [1.9, 2.7]                                   |
| <b>PFS, months</b>                               |                                         |                                                  |
| Patients who died or had PD, n                   | 30                                      | 148                                              |
| Censored, n                                      | 9                                       | 32                                               |
| Median (95% CI)                                  | 1.9 [1.7, 3.7]                          | 1.9 [1.9, 3.2]                                   |
| <b>OS, months</b>                                |                                         |                                                  |
| Patients who died, n                             | 19                                      | 75                                               |
| Censored, n                                      | 20                                      | 105                                              |
| Median (95% CI)                                  | 14.9 [7.0, 19.3]                        | 11.7 [8.6, 14.1]                                 |

Abbreviations: AE, adverse event; CB, clinical benefit; CBR, clinical benefit rate; CI, confidence interval; CR, complete response; DCR, disease control rate; DOR, duration of response; DOT, duration of treatment; NA, not applicable; NE, not evaluable; ORR, overall response rate; OS, overall survival; PFS, progression-free survival; PD, progressive disease; PR, partial response; SD, stable disease; TTR, time to response. Time to event parameters were estimated using Kaplan-Meier method.

<sup>a</sup>Based on investigator assessment.

<sup>b</sup>Calculated based on response evaluable set within the monotherapy or combination therapy cohort.

<sup>c</sup>CBR is defined as achieving confirmed CR, PR or SD of at least 24 weeks (CBR-24) or 16 weeks (CBR-16) from cycle 1 day 1.

<sup>d</sup>Analyzed for responders only.

<sup>e</sup>Defined as discontinuation due to AEs, progressive disease, and death.
