# Supplementary material
Source: PubMed Central journal article supplement (PMC10388696)
Supplement: NIHMS1890347-supplement-7.pdf [file NIHMS1890347-supplement-7.pdf]

**Table S4: Representativeness of Study Participants**

| <b>Cancer type</b>                       | <b>Advanced solid tumors</b>                                                                                                                                                                                                                                                                                                                                                                                                                                                                                                                                                                                                                                                                                                                                                                                                                  |
|------------------------------------------|-----------------------------------------------------------------------------------------------------------------------------------------------------------------------------------------------------------------------------------------------------------------------------------------------------------------------------------------------------------------------------------------------------------------------------------------------------------------------------------------------------------------------------------------------------------------------------------------------------------------------------------------------------------------------------------------------------------------------------------------------------------------------------------------------------------------------------------------------|
| Considerations related to:               |                                                                                                                                                                                                                                                                                                                                                                                                                                                                                                                                                                                                                                                                                                                                                                                                                                               |
| Sex                                      | In 2019, the male-to-female incidence ratio for all new cancers was 1.14 (95%CI 1.14-1.15) in the United States (US).                                                                                                                                                                                                                                                                                                                                                                                                                                                                                                                                                                                                                                                                                                                         |
| Age                                      | The probability of developing an invasive cancer increases with age. In 2017-2019 in the US, the percent probability of developing an invasive cancer was ~6% in adults 50-59 years compared to ~30% in adults 70 years and older.                                                                                                                                                                                                                                                                                                                                                                                                                                                                                                                                                                                                            |
| Race/ethnicity                           | In the US from 2015 to 2019, overall cancer incidence (rate per 100,000 population) was highest among White people (466.6), followed American Indian/Alaskan Native (456.8) and Black people (453.7).                                                                                                                                                                                                                                                                                                                                                                                                                                                                                                                                                                                                                                         |
| Geography                                | In 2022, it is estimated that there were 1,958,310 new cancer cases and 609,820 cancer deaths in the US. Approximately 90% of these new cancer cases were projected to be solid tumors.                                                                                                                                                                                                                                                                                                                                                                                                                                                                                                                                                                                                                                                       |
| Other Considerations                     | In 2017-2019, the rates of new cancer cases in the US among individuals aged 20-49 years were 80% higher in females than in males, whereas, among those aged 75 years and older, they were nearly 50% higher in men.                                                                                                                                                                                                                                                                                                                                                                                                                                                                                                                                                                                                                          |
| Overall representativeness of this study | <p>The sex distribution in our study is reflective of the distribution of male-to-female cancer cases in the US reported in the literature, with a slightly higher number of men enrolled (50.7%) than women (49.3%).</p> <p>Median age in our study was 62.0 years and ranged from 24 to 86 years. A greater percentage of males (~18%) were aged 70 years or older versus females (~7%). The age profile observed in our study is consistent with the expected age profile for solid tumors reported in the literature.</p> <p>Most patients in our study were White (72.6%), followed by Black or African American (9.13%), and Asian (6.39%); 5.02% identified as more than 1 race and 6.85% were unknown or not reported. Our study was limited to 10 study sites across the US and evaluated a wide range of advanced solid tumors.</p> |

Source: Siegel RL, Miller KD, Fuchs HE, and Jemal A. 2021. 'Cancer Statistics, 2021', *CA J Clin*, 71: 7-33.
